# Supplementary material
Source: Springer Nature journal article supplement (https://www.springermedizin.de/resource/supplementary/12882_2012_321_MOESM1_ESM.pdf/9453622)

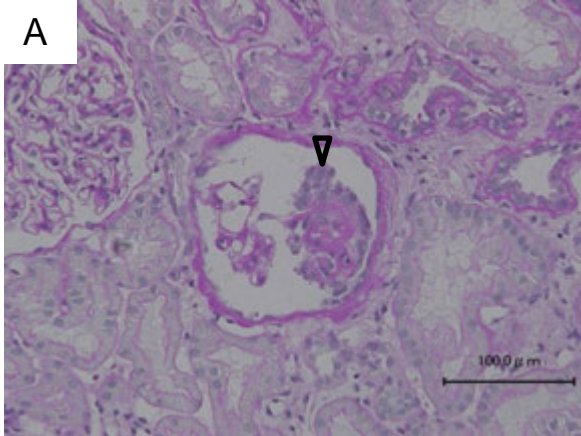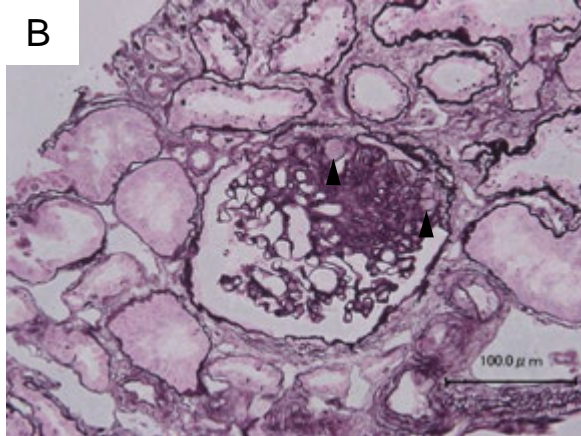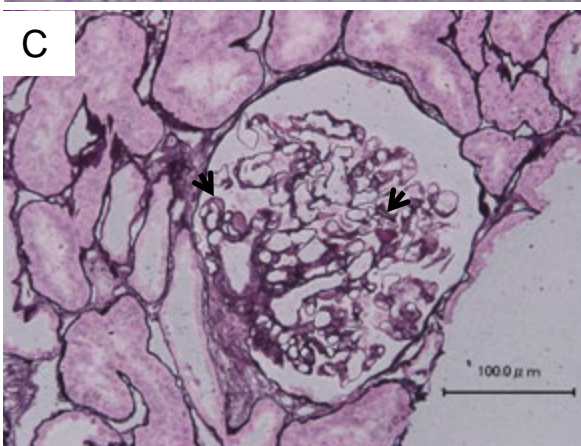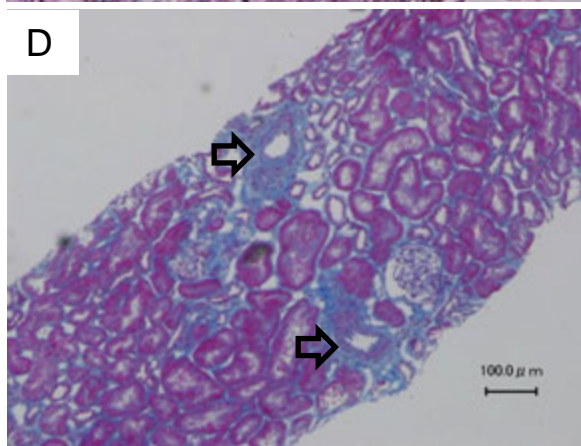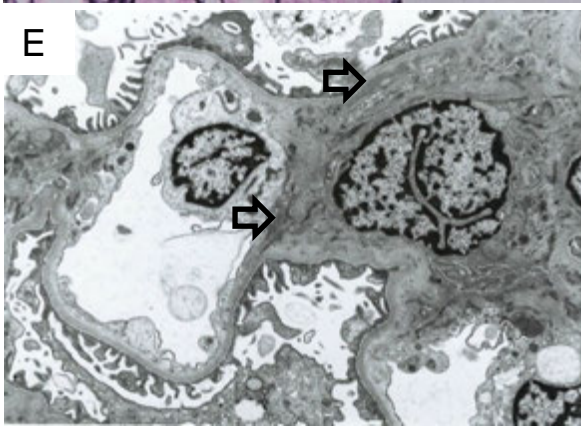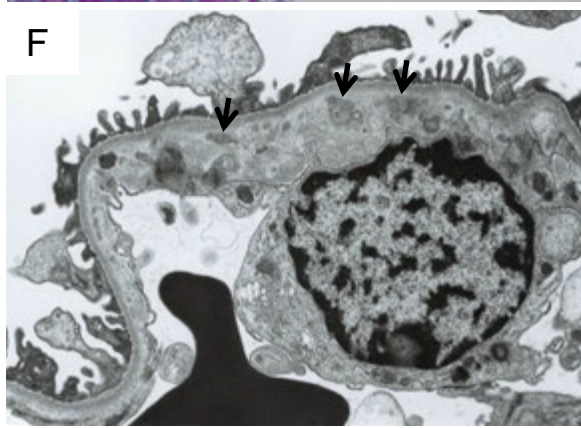

Supplement: MOESM1 [file 9453622]
